# Supplementary material for: Lifestyles, Food Consumption Frequencies, and Eating Behaviors among Three Main Disciplines of Undergraduate Students during the Early COVID-19 Outbreak in Thailand
Source: MDPI journal article supplement (doi:10.3390/nu15122765), 2023-06-16

## Supplementary Materials

**Figure S1.** BMI Distribution among Undergraduate Students by Disciplines of Study

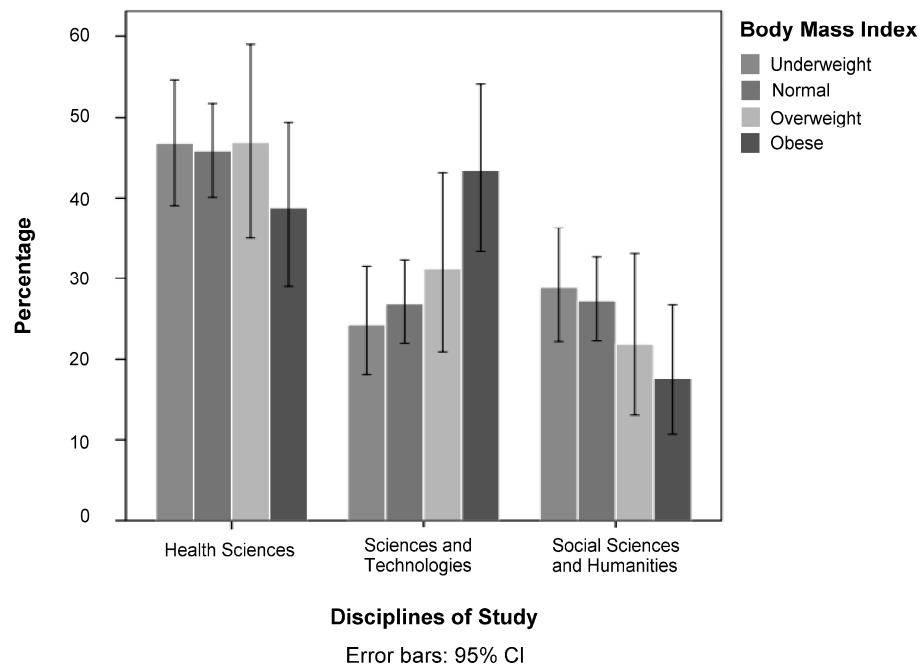

**Figure S2.** Association of BMI and Lifestyles (Hours per Week of Online Studying, Hours per Day of Social Media) among the Three Disciplines of Study

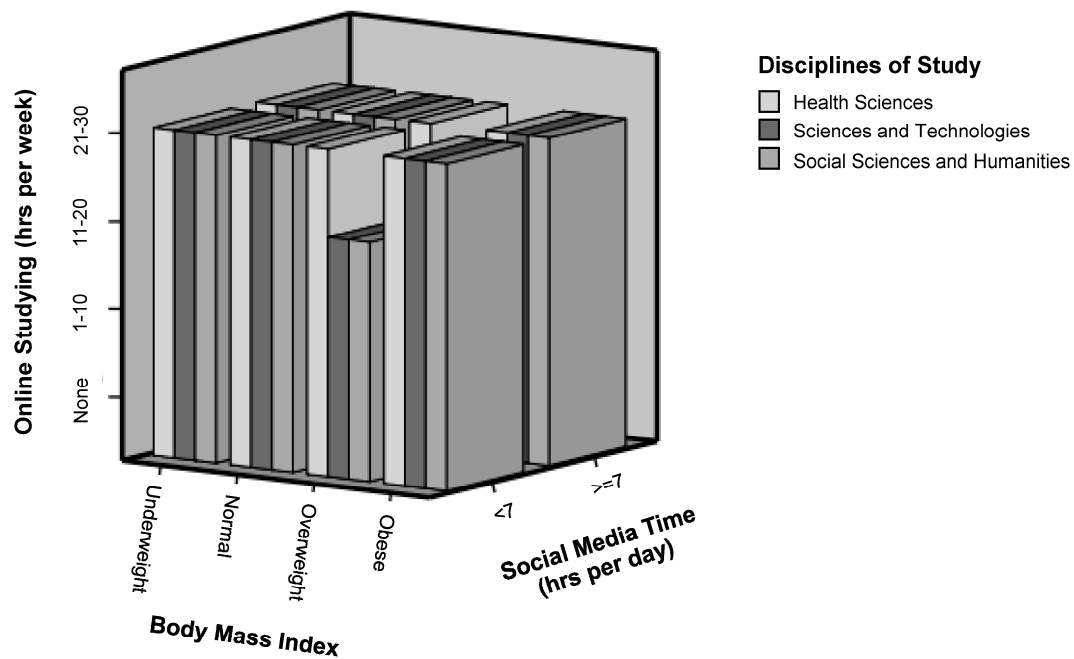

**Figure S3.** Association of BMI, Food Consumption Frequencies, and Lifestyle (Screen Time per Day) among the Three Disciplines of Study

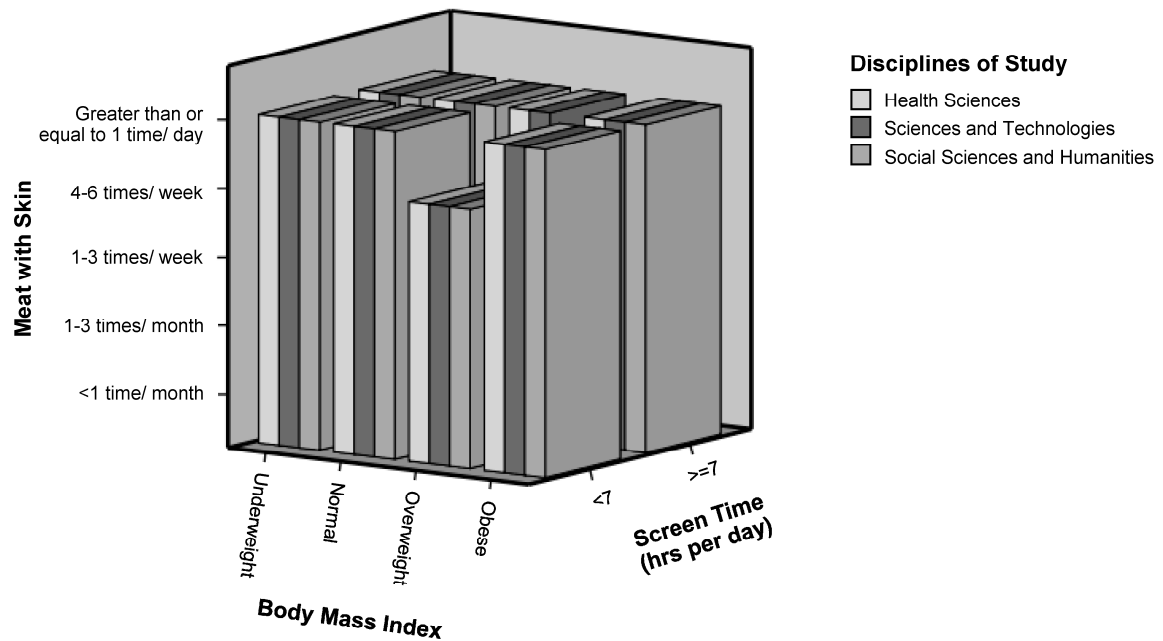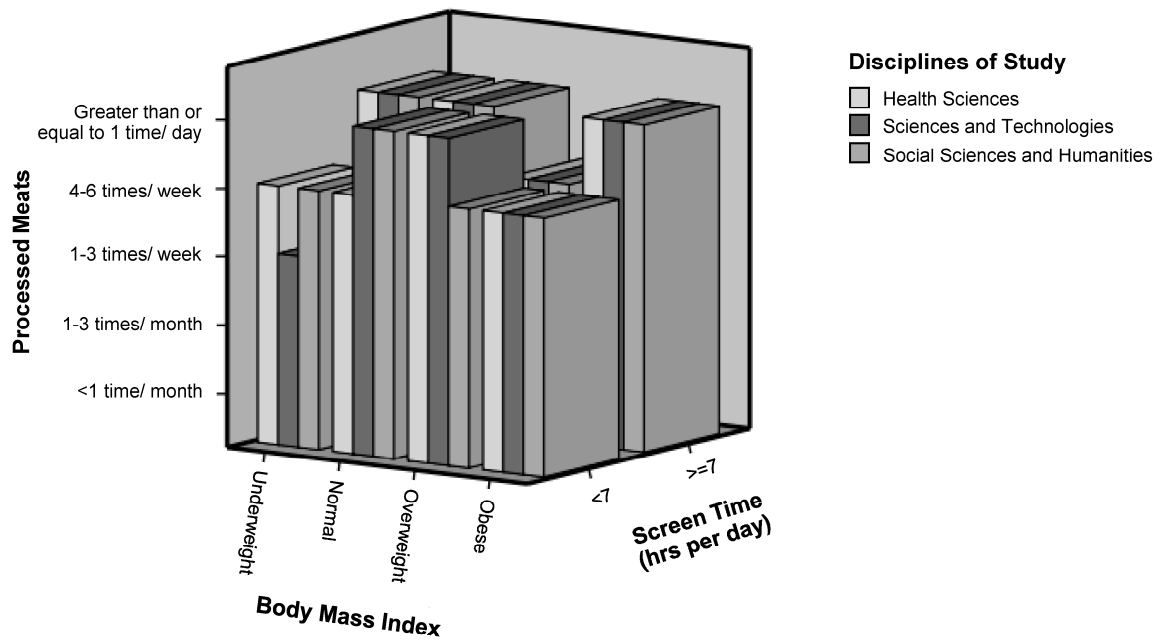

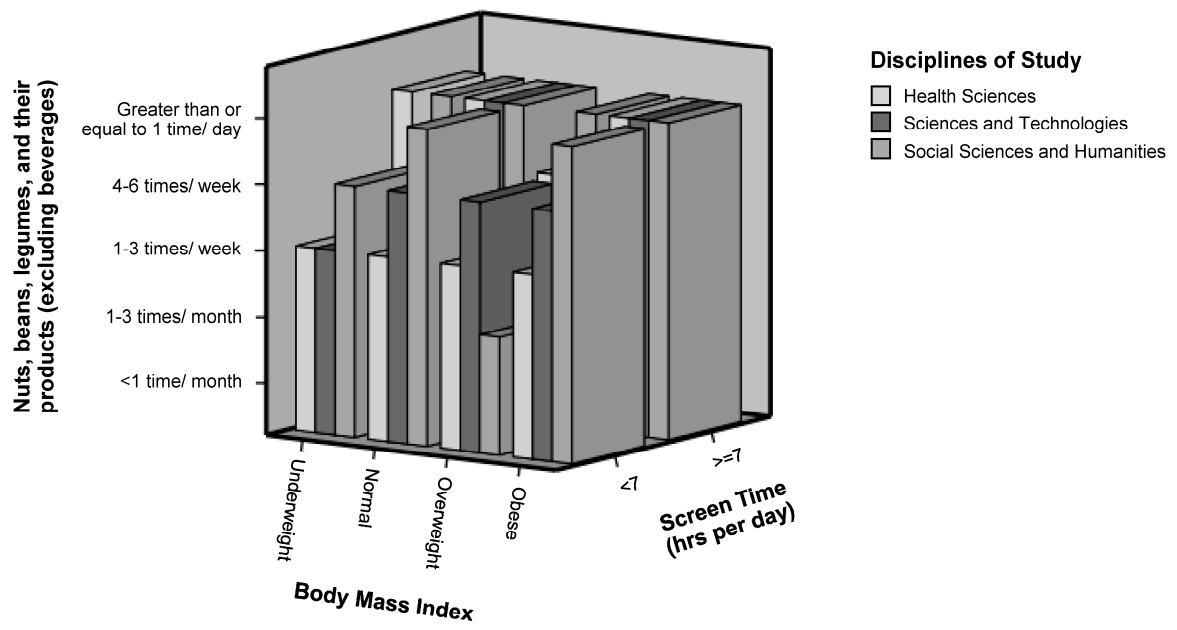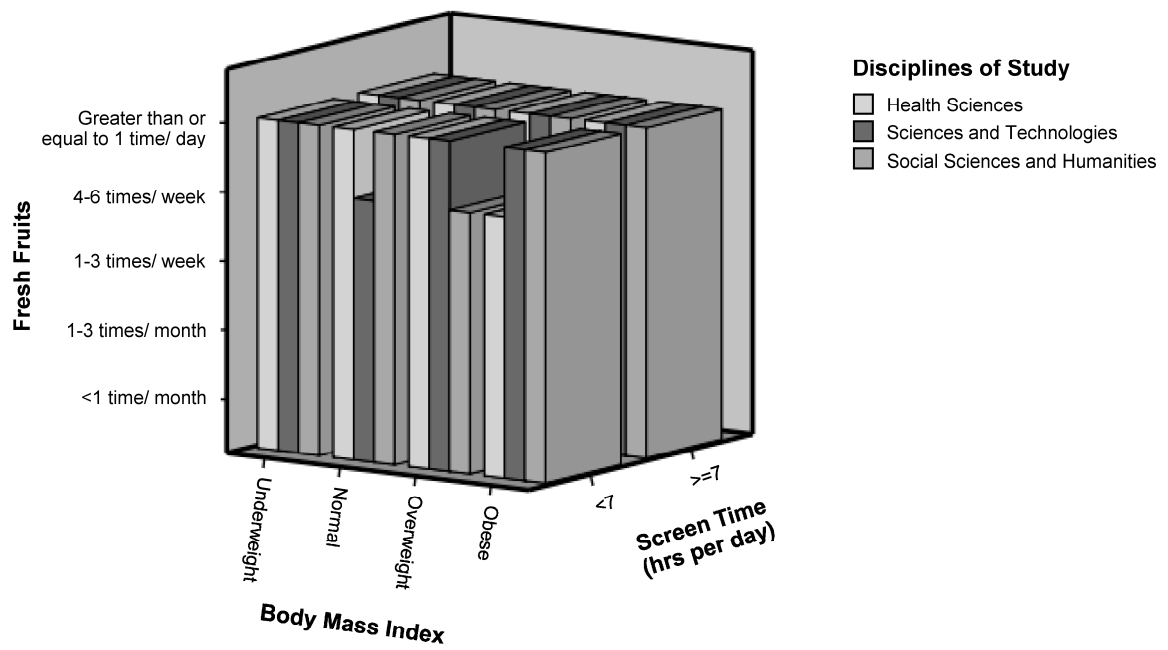

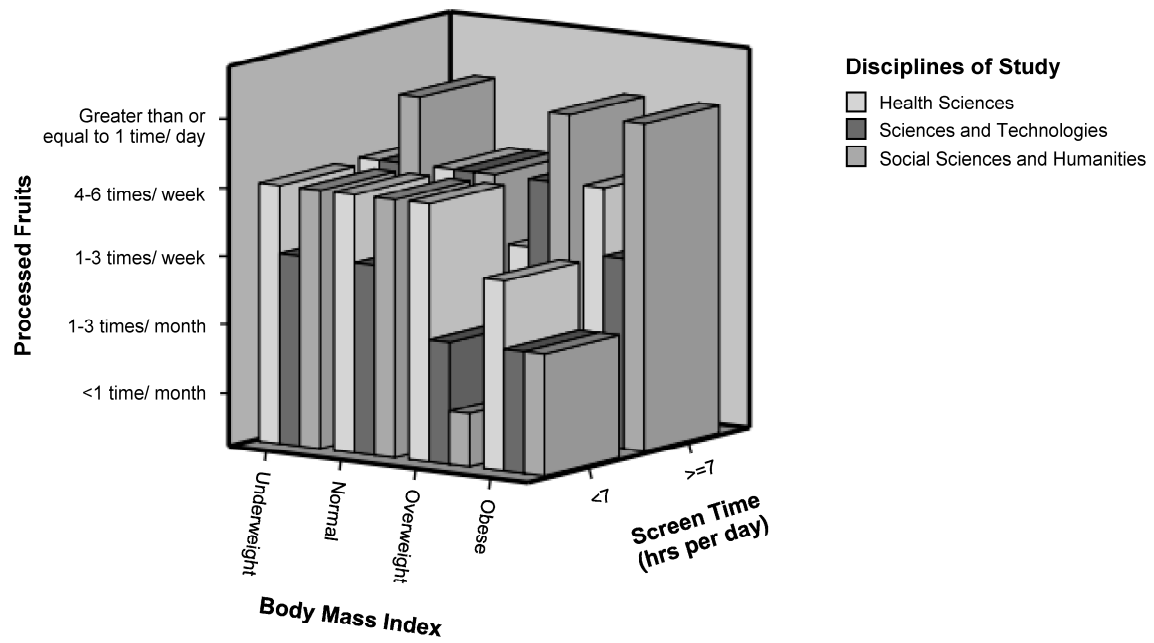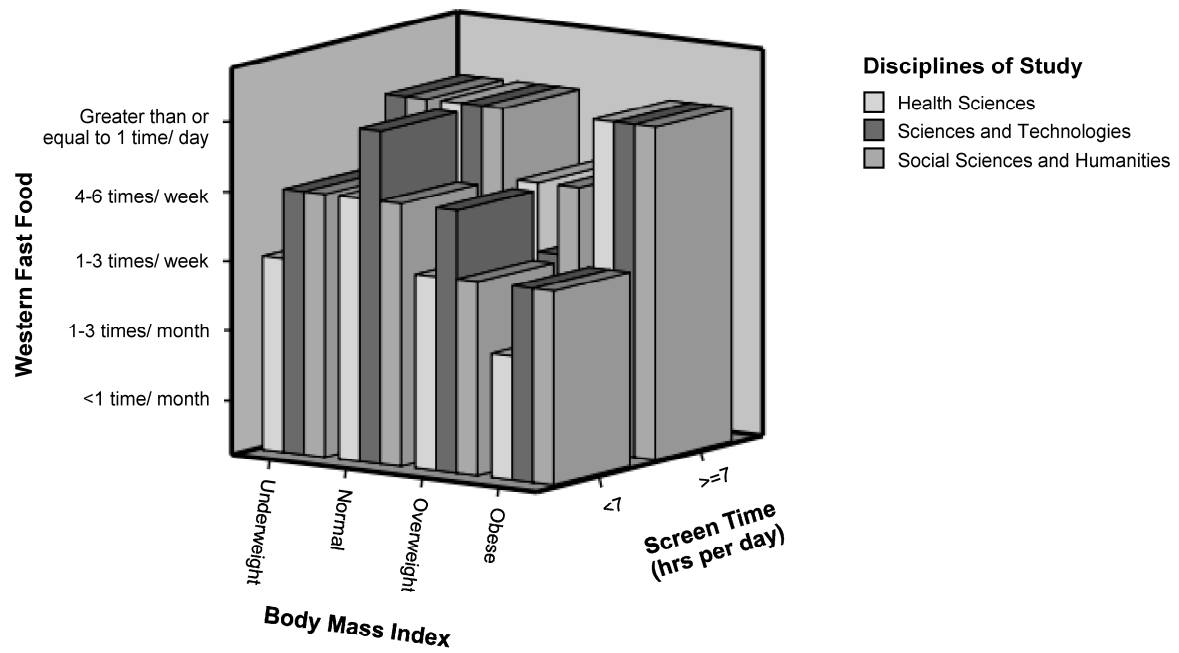

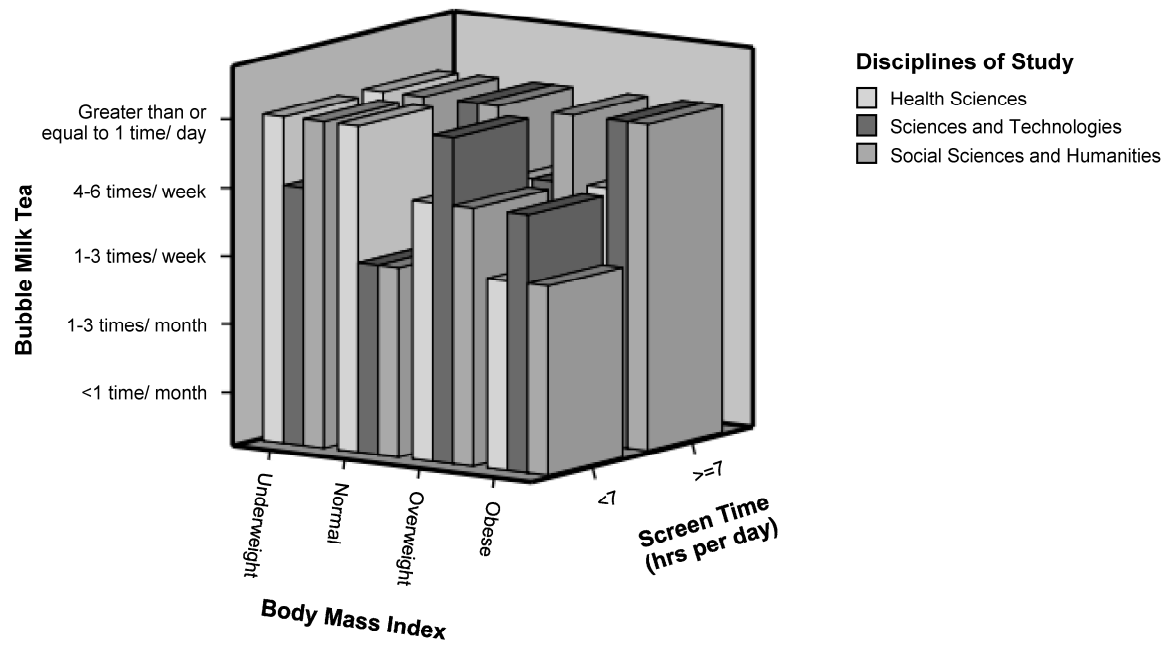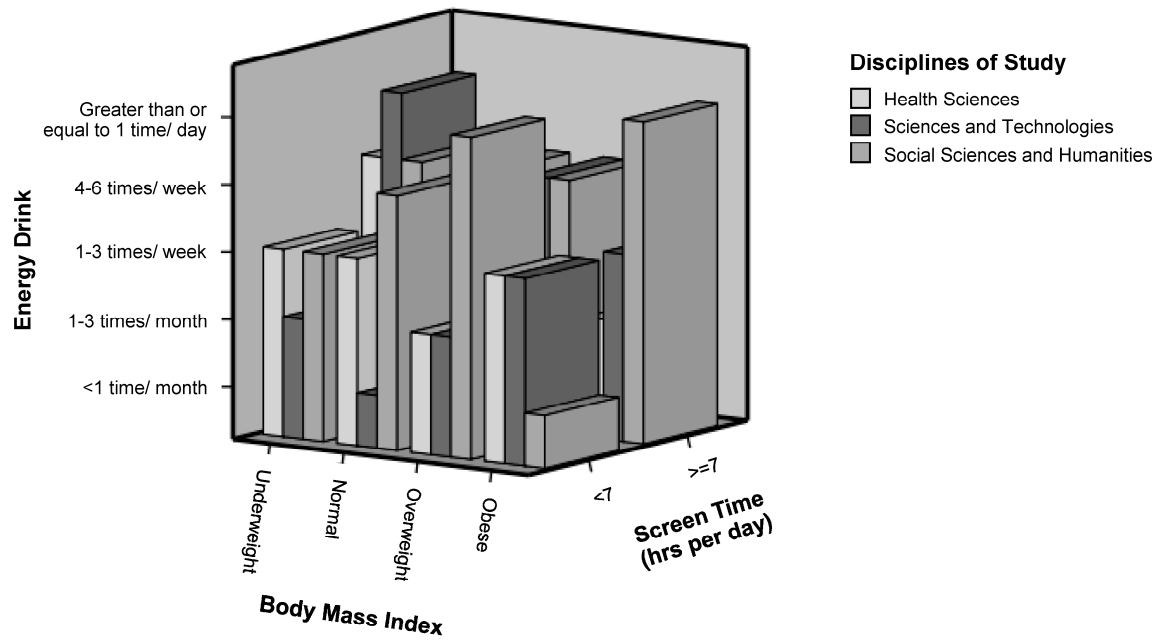

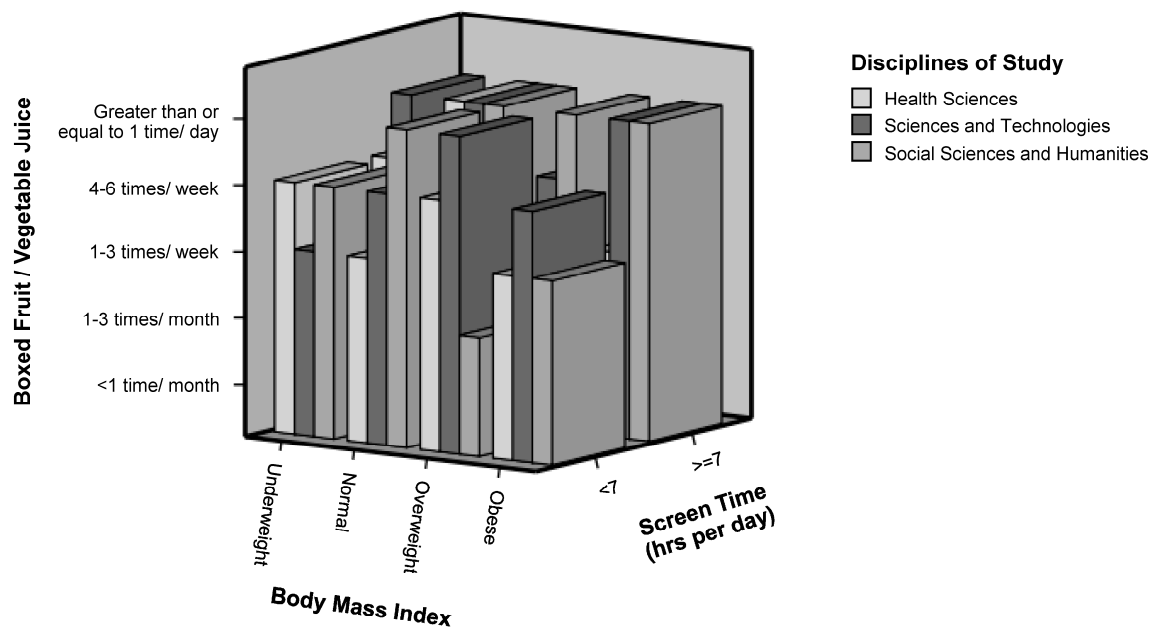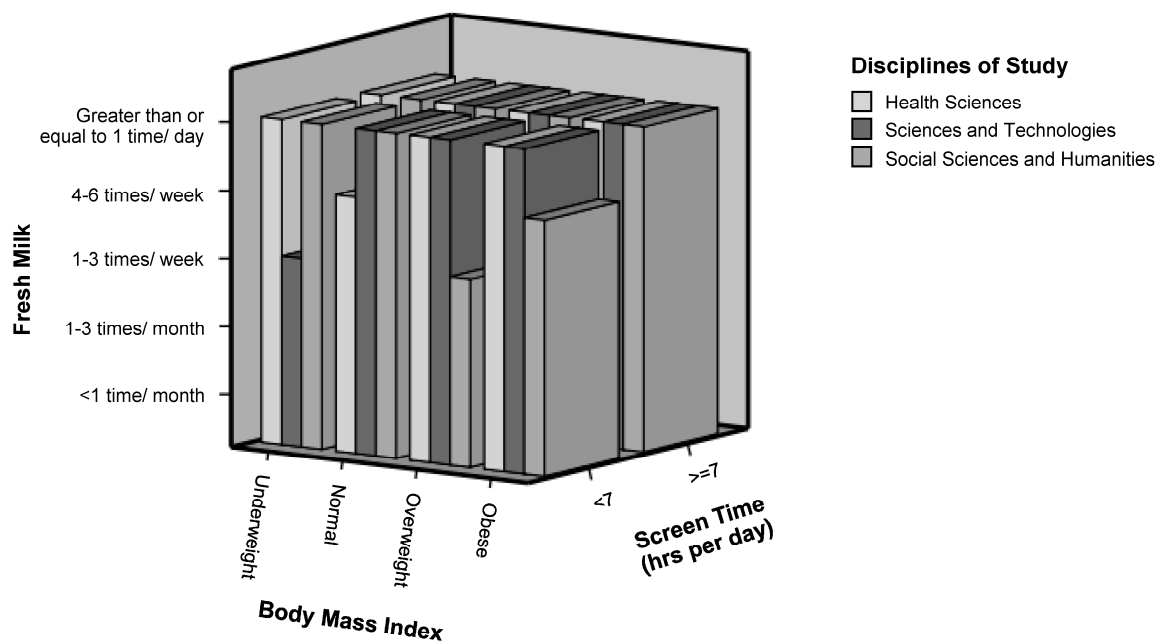

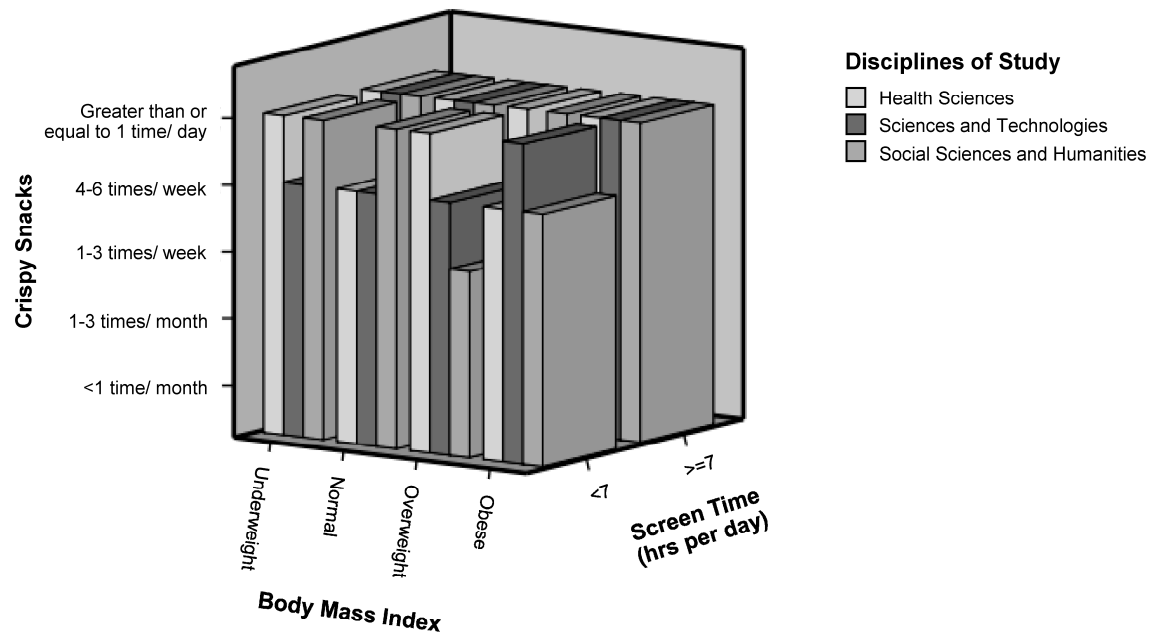

Supplement: s1 [file s1]
